# Supplementary material for: Secondary metabolites of Diaporthe cameroonensis , isolated from the Cameroonian medicinal plant Trema guineensis
Source: publisher site journal article supplement (doi:10.3762/bjoc.19.112), 2023-10-13
Supplement: Additional file 1 [file 1860-5397-19-112-S1.pdf]

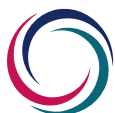

## Supporting Information

for

### **Secondary metabolites of *Diaporthe cameroonensis*, isolated from the Cameroonian medicinal plant *Trema guineensis***

Bel Youssouf G. Mountessou, Élodie Gisèle M. Anoumedem, Blondelle M. Kemkuignou, Yasmina Marin-Felix, Frank Surup, Marc Stadler and Simeon F. Kouam

*Beilstein J. Org. Chem.* **2023**, *19*, 1555–1561. [doi:10.3762/bjoc.19.112](https://doi.org/10.3762/bjoc.19.112)

### **HRESIMS data and $^1\text{H}$ , $^{13}\text{C}$ , COSY, HSQC, and HMBC NMR spectra of compounds 1 and 2**

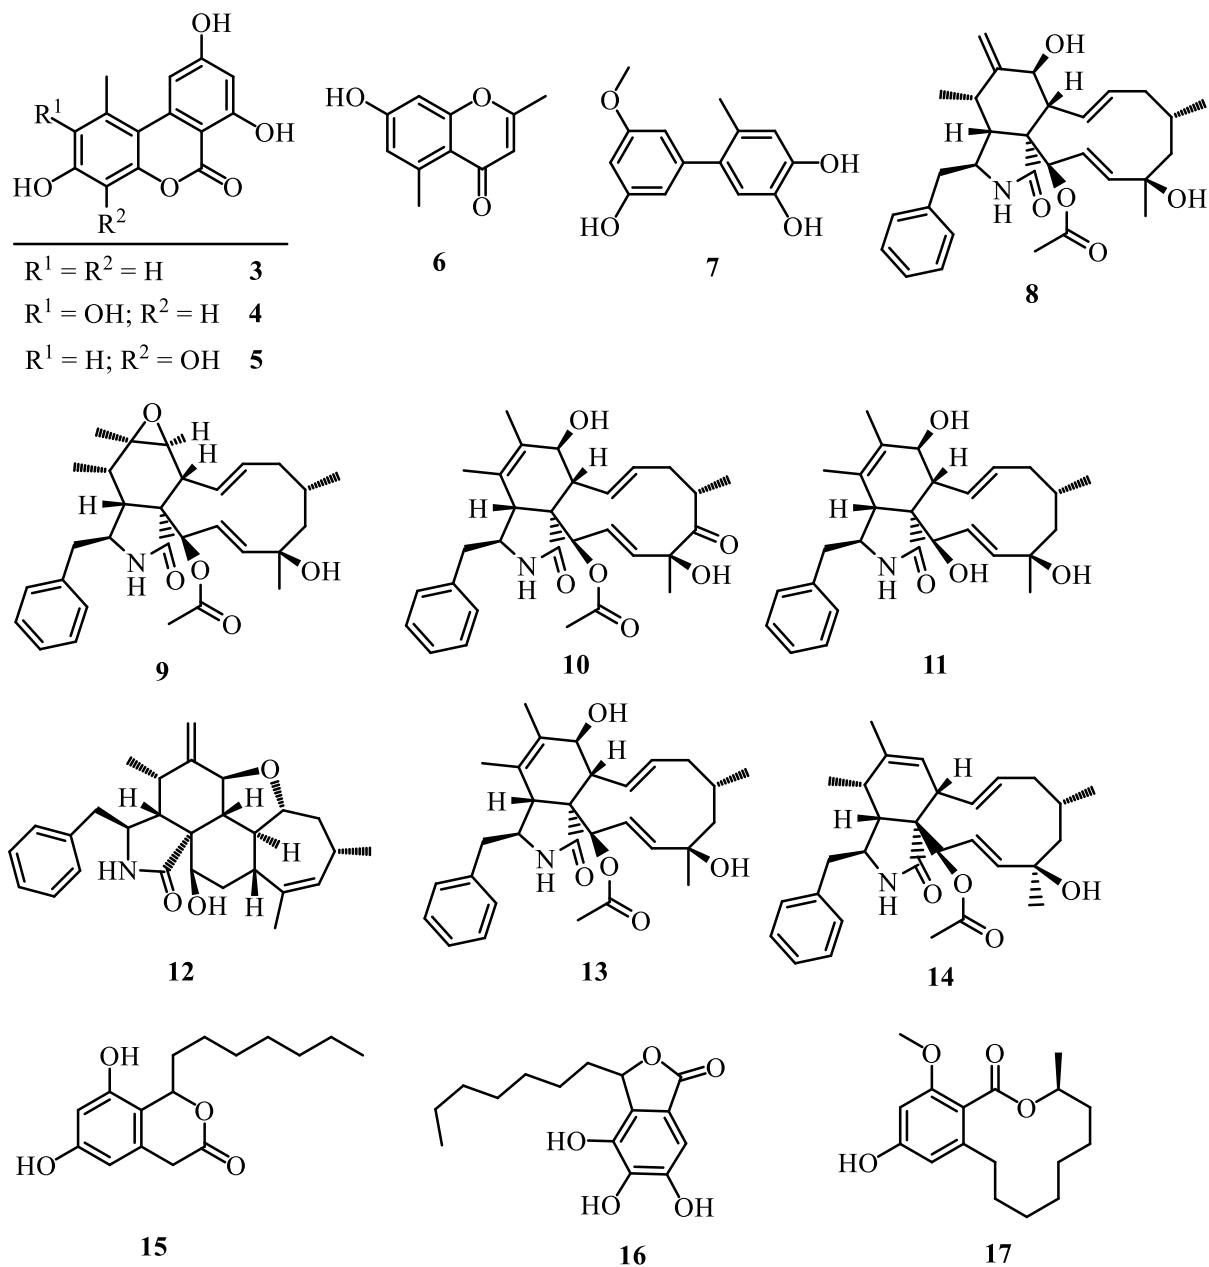

**Figure S1:** Chemical structures of compounds 3–17.

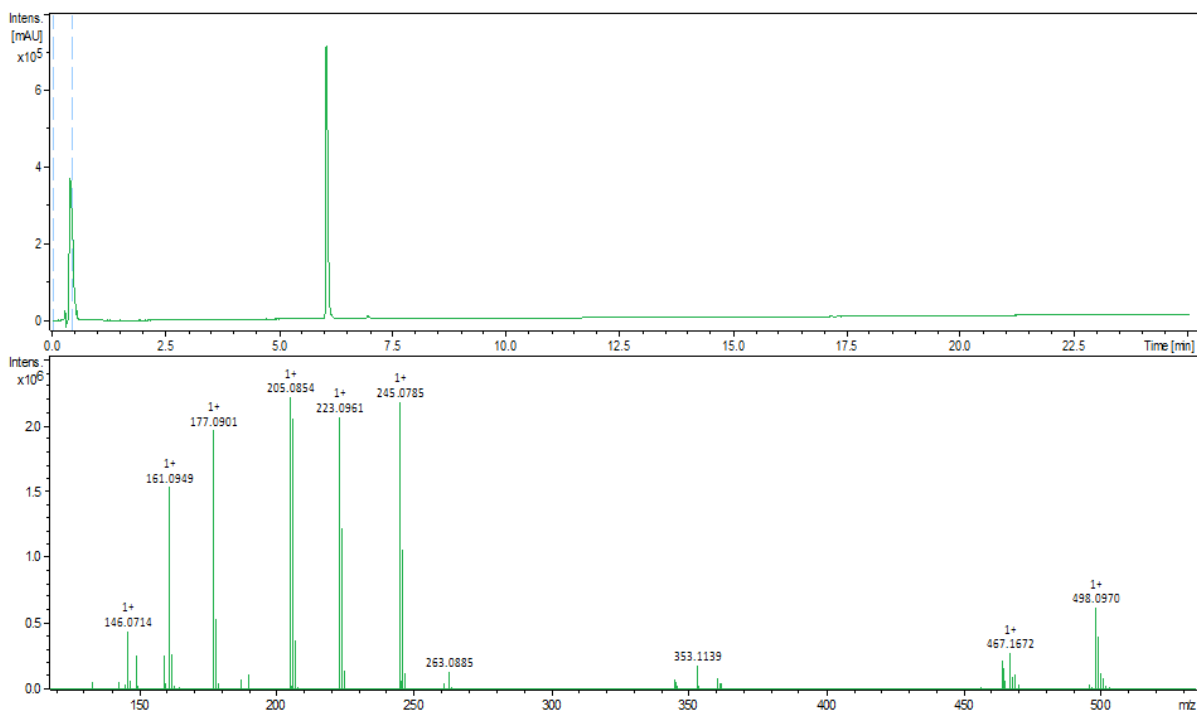

**Figure S2:** HPLC chromatogram (a) and positive-ion mode HRESIMS spectrum (b) of compound **1**.

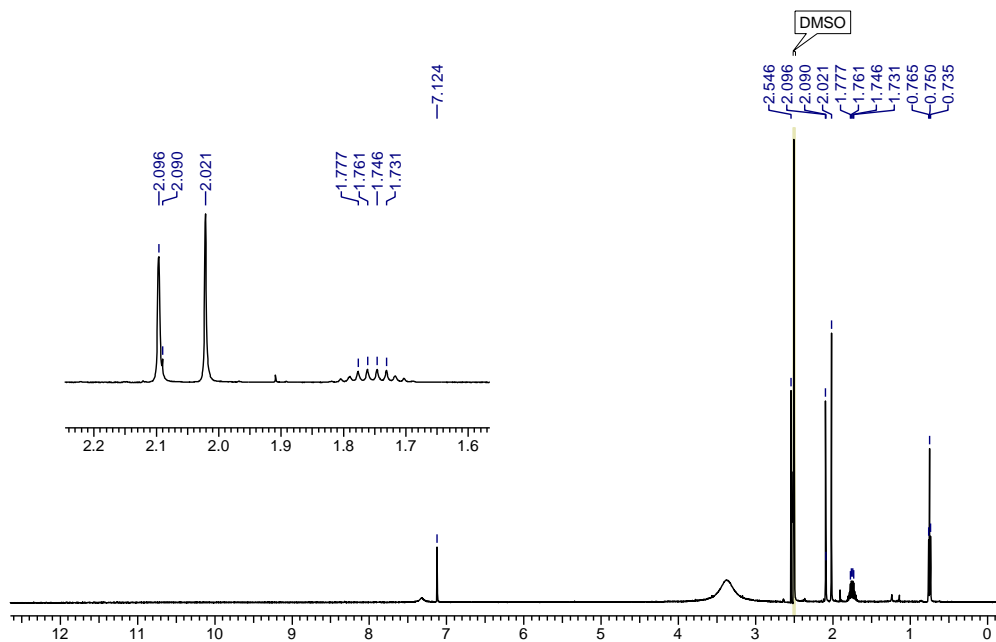

**Figure S3:** <sup>1</sup>H NMR spectrum of compound **1** (500 MHz, DMSO-*d*<sub>6</sub>).

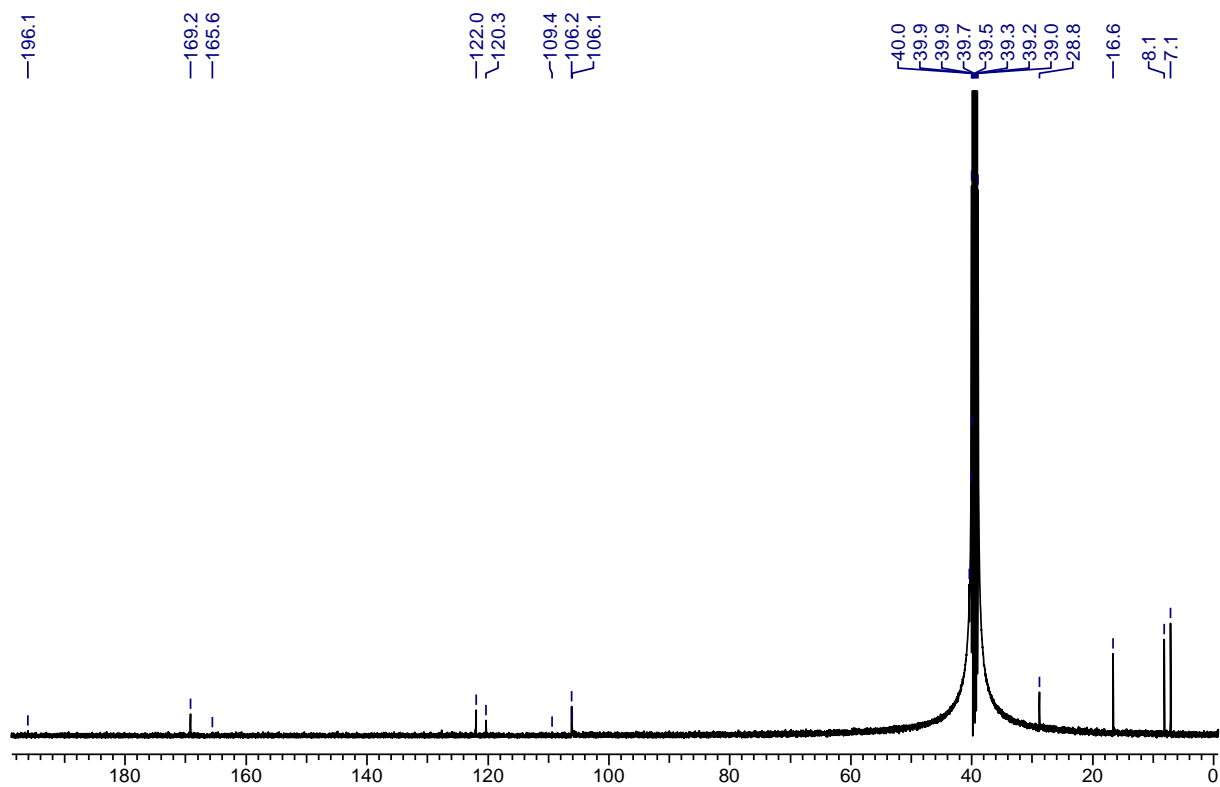

**Figure S4:**  $^{13}\text{C}$  NMR spectrum of compound **1** (125 MHz,  $\text{DMSO-}d_6$ ).

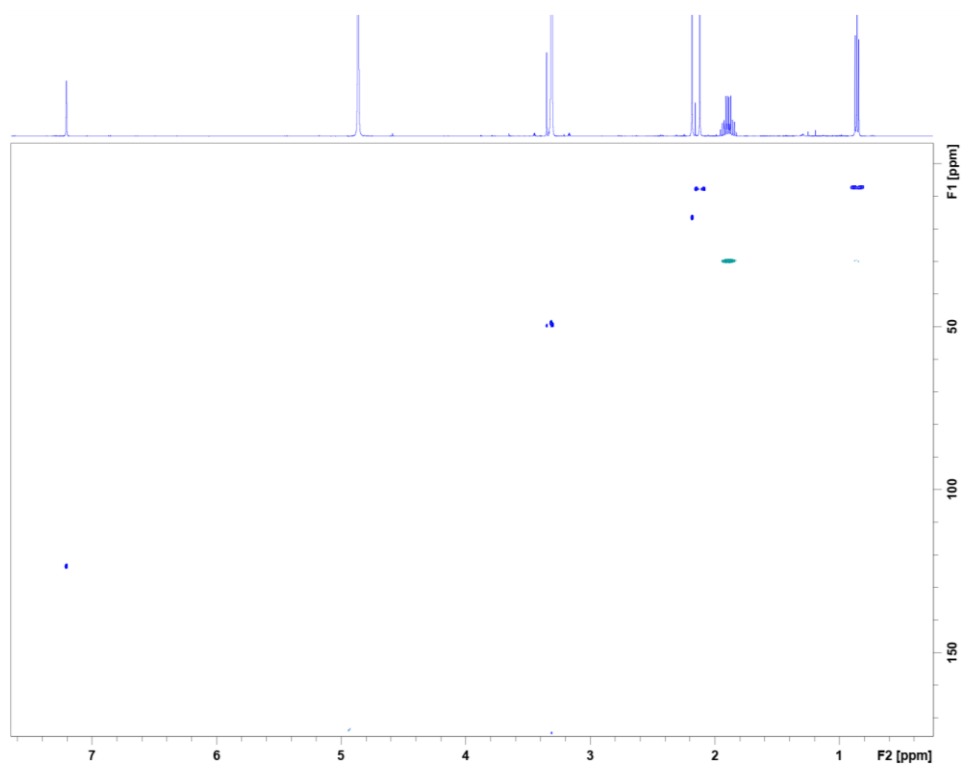

**Figure S5:** HSQC-DEPT spectrum of compound **1**.

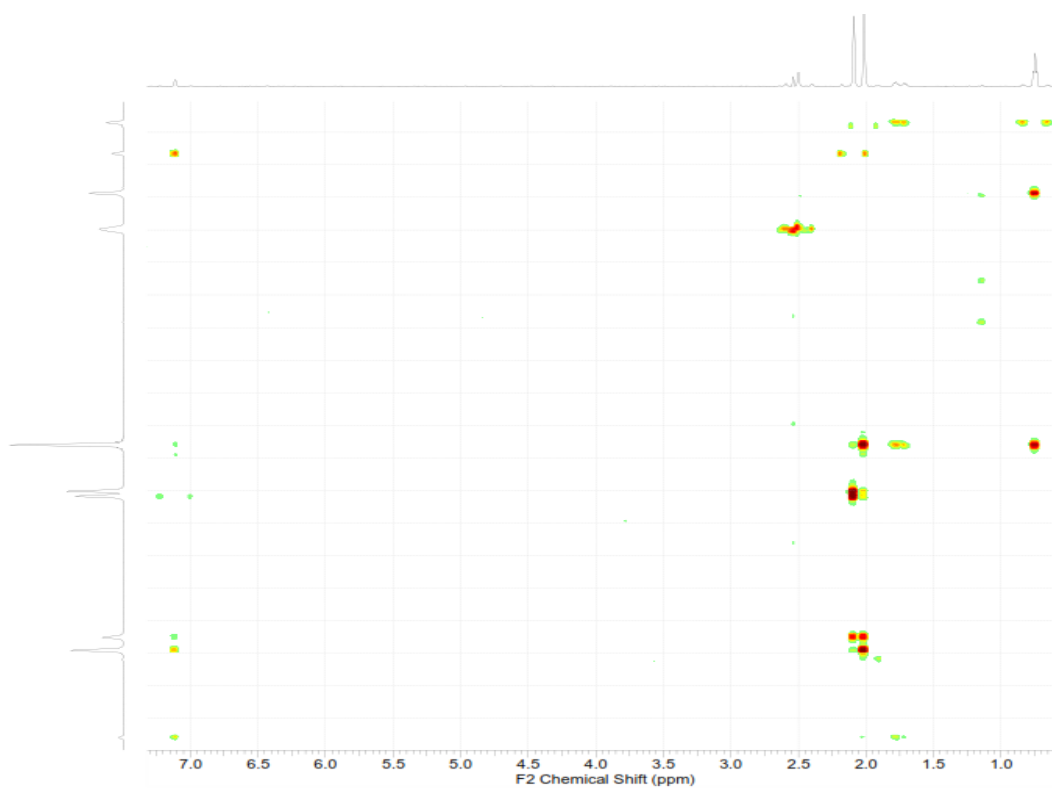

**Figure S6:** HMBC spectrum of compound **1**.

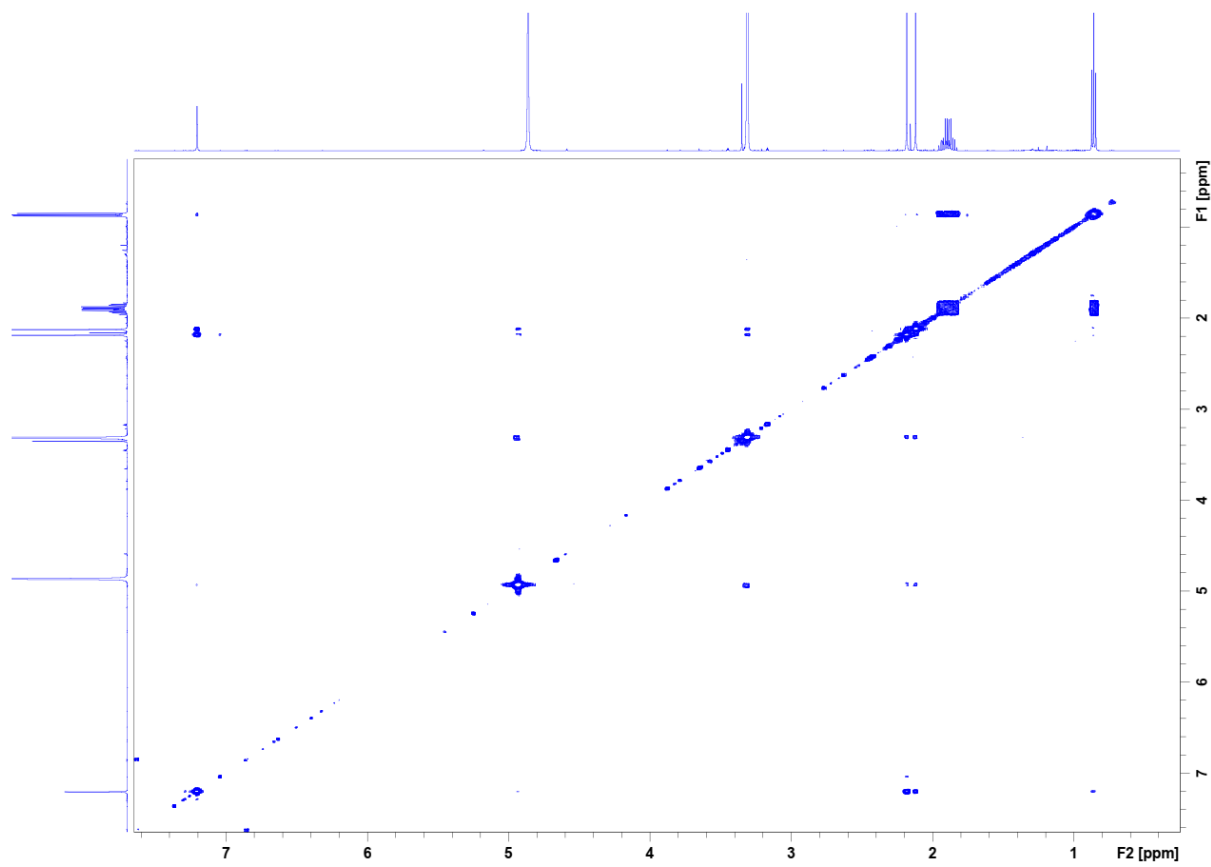

**Figure S7:** COSY spectrum of compound **1**.

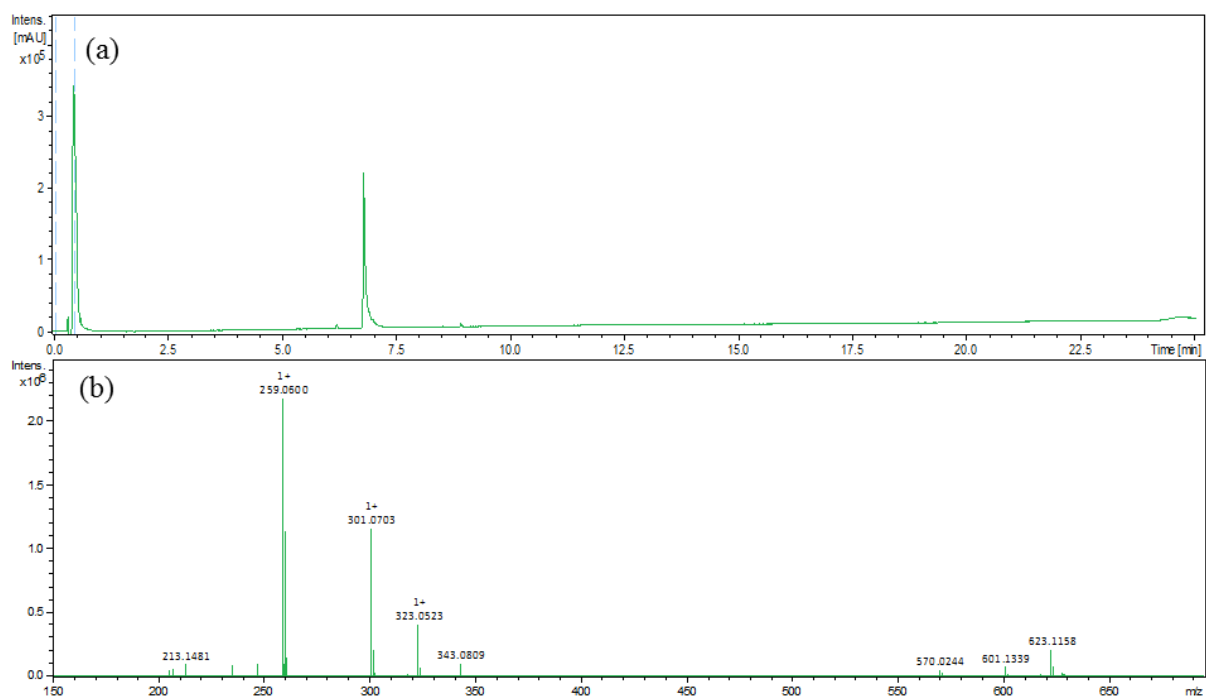

**Figure S8:** HPLC chromatogram (a) and positive ion mode HRESIMS spectrum (b) of compound **2**.

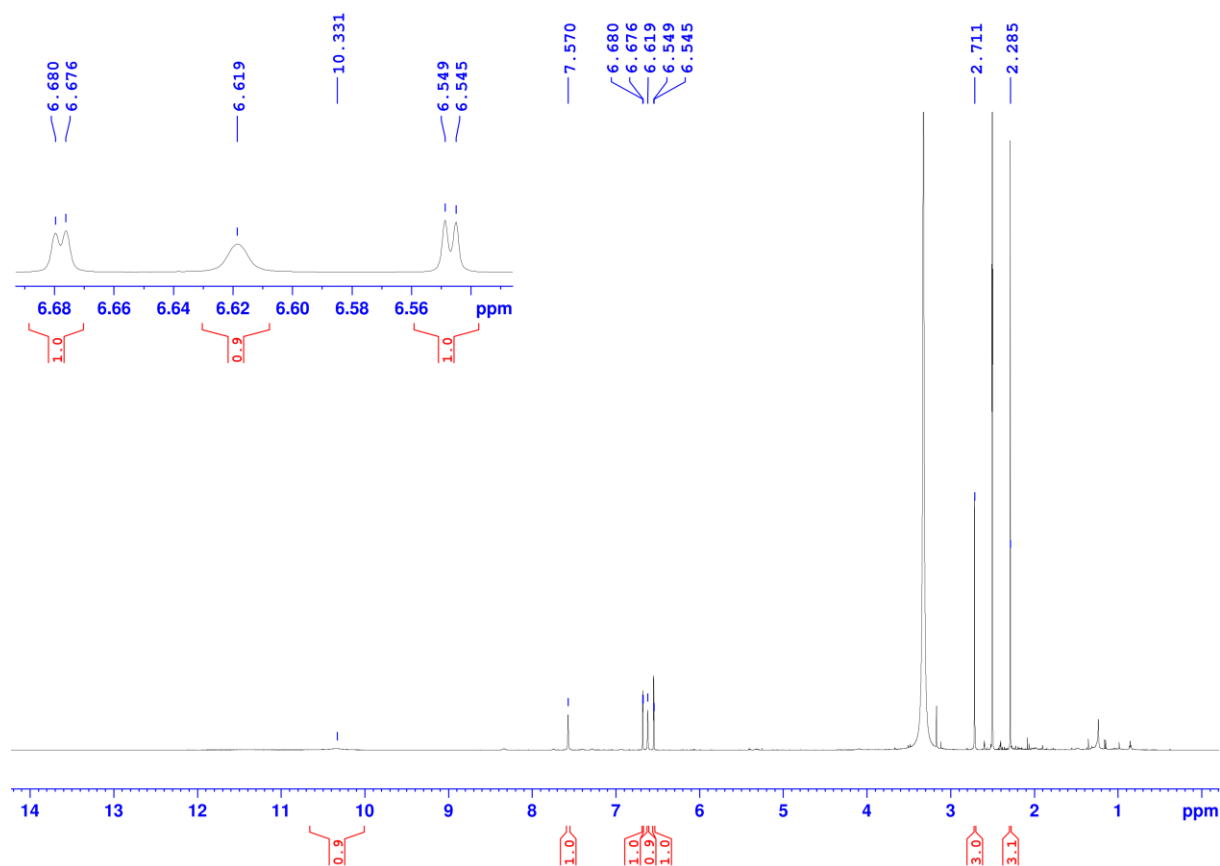

**Figure S9:**  $^1\text{H}$  NMR spectrum of compound **2** (500 MHz,  $\text{DMSO-}d_6$ ).

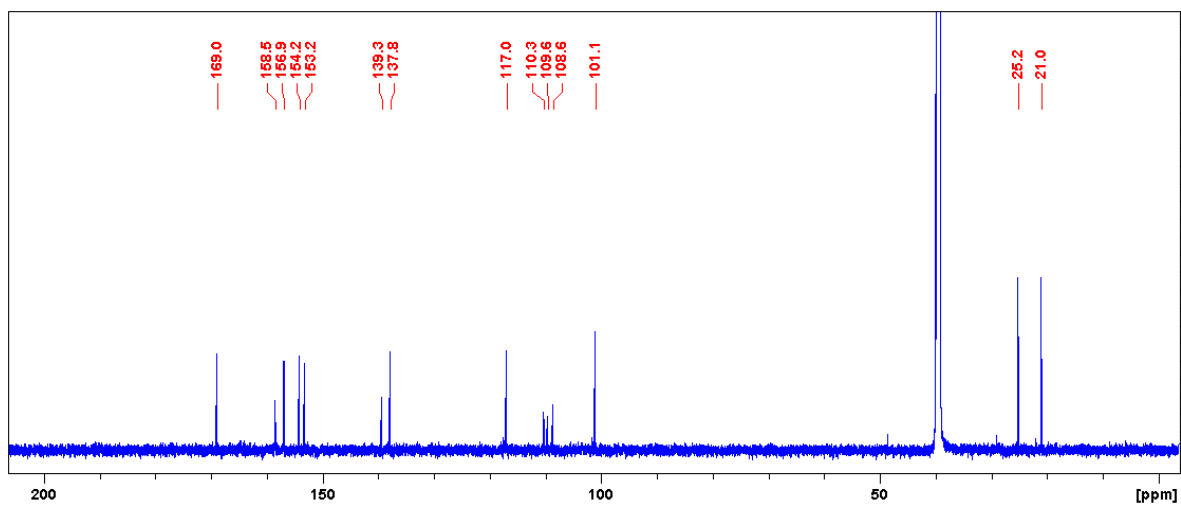

**Figure S10:**  $^{13}\text{C}$  NMR spectrum of compound **2** (125 MHz,  $\text{DMSO-}d_6$ ).

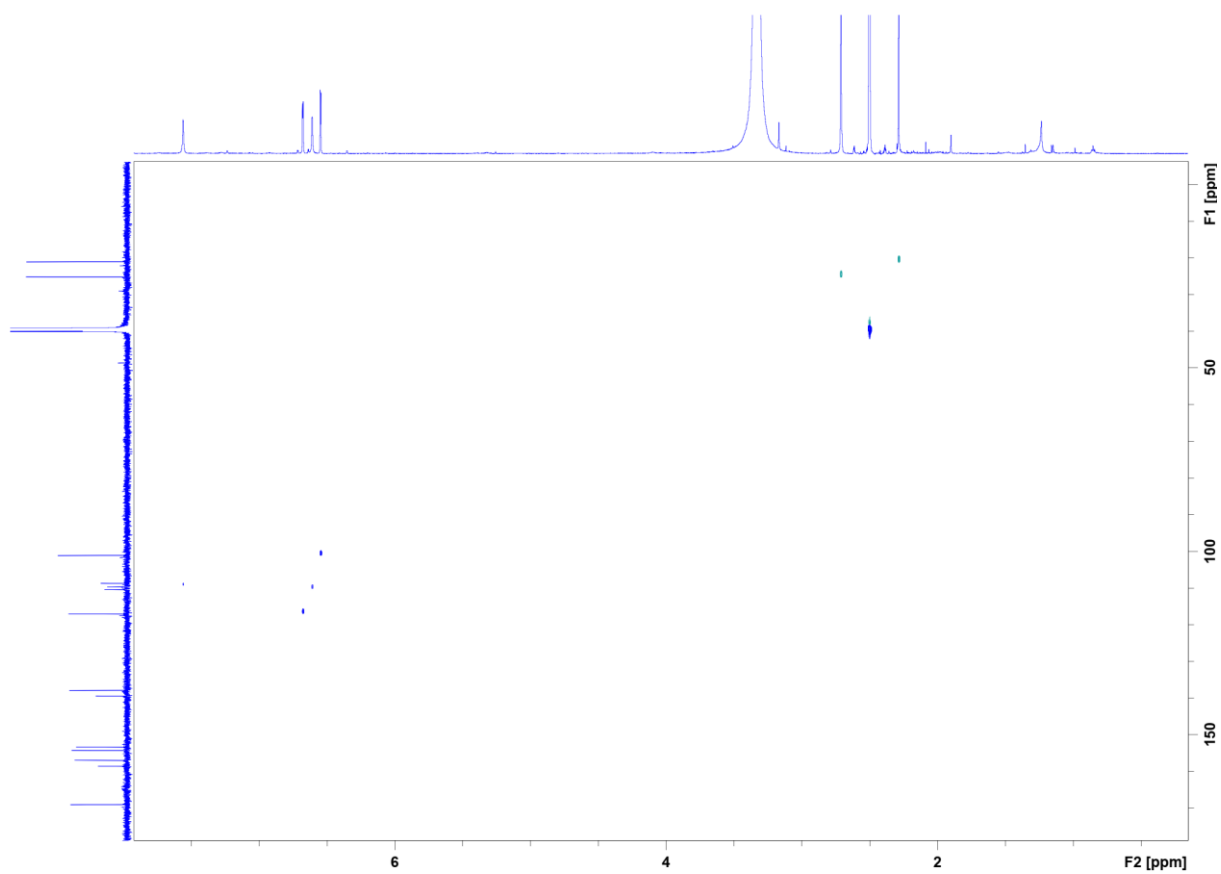

**Figure S11:** HSQC-DEPT spectrum of compound **2**.

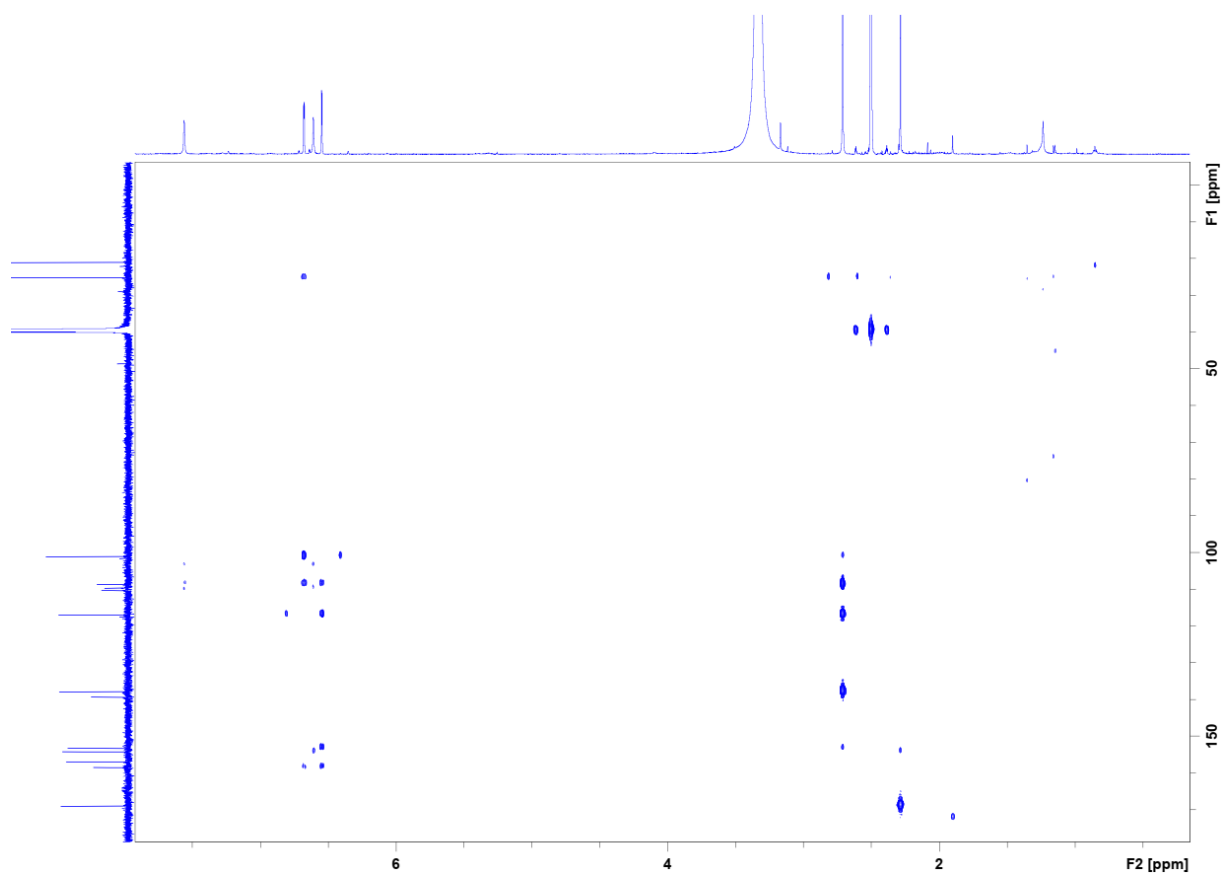

**Figure S12:** HMBC spectrum of compound **2**.

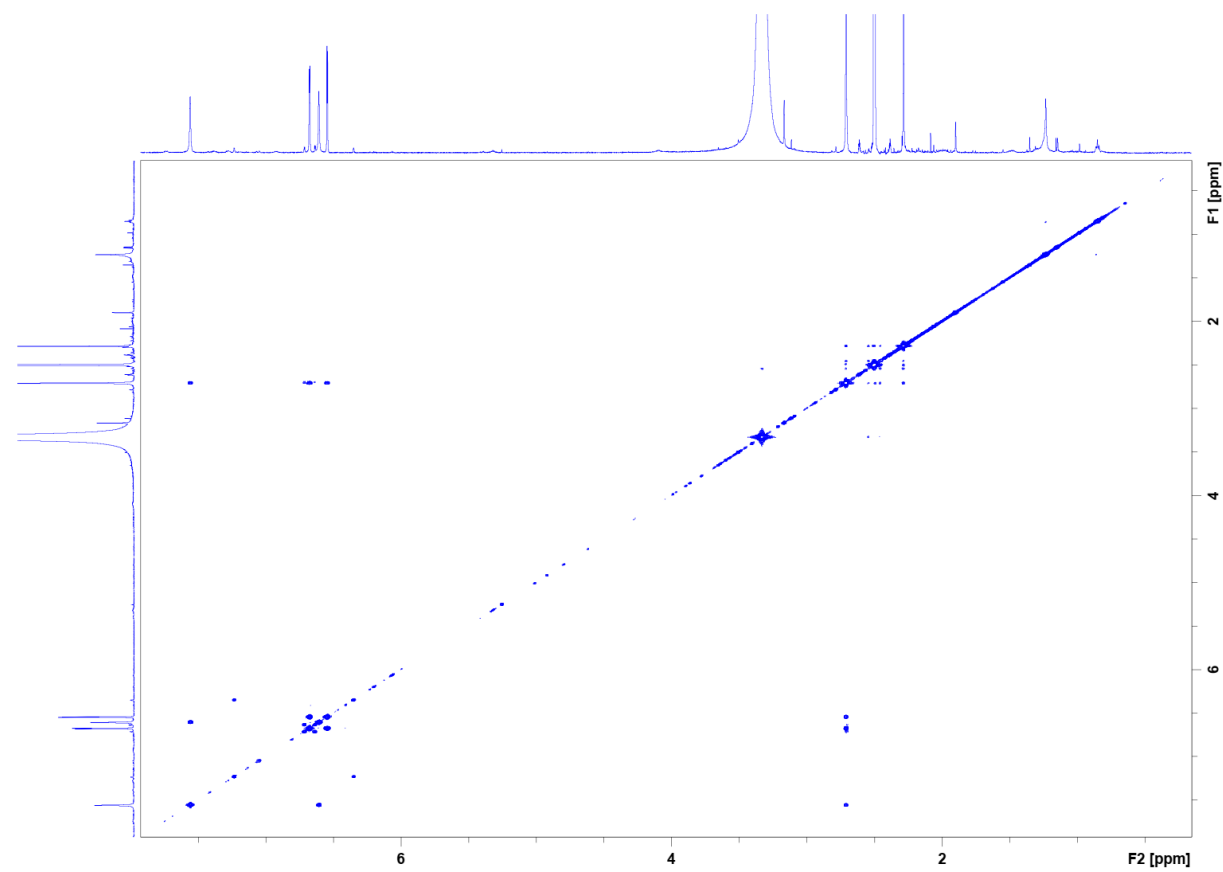

**Figure S13:** COSY spectrum of compound **2**.
